# Supplementary material for: The Effect of Mixed Reality Technologies for Falls Prevention Among Older Adults: Systematic Review and Meta-analysis
Source: PubMed Central journal article supplement (PMC8280833; doi:10.2196/27972), 2021-06-30
Supplement: aging_v4i2e27972_app1.pdf [file aging_v4i2e27972_app1.pdf]

|   | Study                  | Aim                                                                                                                                                             | Type of exercise       | Technology                                                               | Sample size, age (years) (experimental and control groups), gender | Participants' history or risk of falls | Study design                                                      | Involvement of health care professionals                                                        | Duration of intervention and follow-up                                      | Outcome measures                                                                      | Measurements (of physical functions)                                                                                                                 | Results after intervention                                                                                                                                                                            |
|---|------------------------|-----------------------------------------------------------------------------------------------------------------------------------------------------------------|------------------------|--------------------------------------------------------------------------|--------------------------------------------------------------------|----------------------------------------|-------------------------------------------------------------------|-------------------------------------------------------------------------------------------------|-----------------------------------------------------------------------------|---------------------------------------------------------------------------------------|------------------------------------------------------------------------------------------------------------------------------------------------------|-------------------------------------------------------------------------------------------------------------------------------------------------------------------------------------------------------|
| 1 | Park and Yim [60]      | Investigate if a VR <sup>a</sup> kayak program could improve cognitive function, muscle strength, balance                                                       | Virtual "kayaking"     | 3D VR program with a 3D beam projector                                   | 72; 72.97 (SD 2.98) and 74.11 (SD 2.88); male/female: 36/36        | No mention                             | Randomized controlled trial                                       | Not specified                                                                                   | 6 weeks: 2 times per week; 50 minutes per session                           | Cognitive function, muscle strength, standing and sitting balance                     | Handgrip strength, arm curl test, GBS <sup>e</sup>                                                                                                   | Cognitive function ( $P<.05$ ), muscle strength ( $P<.05$ ), and balance ( $P<.05$ ) were significantly improved in EG compared with CG.                                                              |
| 2 | Mirelman et al [29]    | Test if a combination of treadmill training with VR leads to fewer falls than treadmill training alone                                                          | Walking on a treadmill | VR system with a modified Microsoft Kinect, computer, and a large screen | 302; 73.3 (SD 6.4) and 74.2 (SD 6.9); male/female: 182/100         | Experienced fall                       | Randomized controlled trial                                       | Trainer present at all training sessions                                                        | 6 weeks: 3 times per week; 45 minutes per session; follow-up after 6 months | Fall rate; gait speed; variability, endurance, balance; mobility; attention; and more | Zeno instrumented walkway and PKMAS, 2MWT <sup>f</sup> , Short Physical Performance Battery                                                          | Incident rate after training was significantly lower in EG than before training; incident rate did not decrease significantly in CG.                                                                  |
| 3 | Phu et al [45]         | Compare the effects of VR training with the Balance Rehabilitation Unit VS exercise using a modified Otago Exercise Program on balance and physical performance | Balance training       | VR system (Balance Rehabilitation Unit)                                  | 195; median 78 (IQR 73–84); male/female: 65/130                    | Experienced fall or balance issues     | Intervention and control group (participants were not randomized) | Sessions were conducted and supervised by an accredited exercise physiologist                   | 6 weeks: 2 times per week; 30 minutes per session                           | Balance and physical performance, fear of falling                                     | 5TSTS <sup>g</sup> , TUG <sup>h</sup> , gait speed and posturography assessment using the BRU, Falls Efficacy Scale, Handgrip strength and adherence | EG and CG achieved similar improvements in balance and physical performance measures. Only EG improved control of static posture in eyes closed ( $P=.002$ ) and foam eyes closed ( $P=.006$ ) tasks. |
| 4 | Yeşilyaprak et al [44] | Investigate the effects of VR-based balance exercises on balance and fall risk in comparison with conventional balance exercises                                | Balance training       | BTS NIRVANA VR Interactive System                                        | 18; 70.1 (SD 4.0) and 73.1 (SD 4.5); male/female: 6/12             | Experienced fall                       | Intervention and control groups                                   | Supervised by a trained physiotherapist with more than 2 years of experience with the VR system | 6 weeks: 3 times per week; 50 minutes per session                           | Dynamic balance, standing balance, fall risk                                          | BBS <sup>i</sup> , TUG, left leg stance and tandem stance duration with eyes closed                                                                  | Balance and fall risk significantly improved with time ( $P<.05$ ), but changes were similar in EG and CG ( $P>.05$ ).                                                                                |

|   | Study            | Aim                                                                                                                                                                | Type of exercise                                                                           | Technology                                            | Sample size, age (years) (experimental and control groups), gender                   | Participants' history or risk of falls | Study design                    | Involvement of health care professionals                                                                        | Duration of intervention and follow-up                                      | Outcome measures                                                                         | Measurements (of physical functions)                                      | Results after intervention                                                                                                                                                                                                                                                                                                                        |
|---|------------------|--------------------------------------------------------------------------------------------------------------------------------------------------------------------|--------------------------------------------------------------------------------------------|-------------------------------------------------------|--------------------------------------------------------------------------------------|----------------------------------------|---------------------------------|-----------------------------------------------------------------------------------------------------------------|-----------------------------------------------------------------------------|------------------------------------------------------------------------------------------|---------------------------------------------------------------------------|---------------------------------------------------------------------------------------------------------------------------------------------------------------------------------------------------------------------------------------------------------------------------------------------------------------------------------------------------|
| 5 | Lee et al [61]   | Determine the effect of AR <sup>b</sup> -based Otago exercise on muscle strength, balance, and physical factors in older women                                     | Otago exercises (exercises for leg muscle strength and balance, progressing in difficulty) | AR-based Otago exercise                               | 30; 72.60 (SD 2.67), 75.80 (SD 5.47), and 76.40 (SD 5.54); male/female: 0/30         | No mention of fall risk/rate           | Randomized controlled trial     | Not specified. Fall prevention education was provided to participants once                                      | 12 weeks: 3 times per week; 60 minutes per session                          | Muscle strength, balance ability, static and dynamic load distribution, fall efficacy    | MMT <sup>l</sup> , FP <sup>k</sup> , MFS <sup>l</sup>                     | Knee flexion and ankle dorsiflexion strength significantly improved in all groups. Balance, measured as eye open center of pressure (CoP)-x, significantly decreased in the EG and yoga groups. Eye closed CoP-x, eye open standard deviation-x, and eye open height of ellipse significantly decreased only in EG. EG showed improvement in MFS. |
| 6 | Duque et al [46] | Evaluate the effect of a VR system (Balance Rehabilitation Unit) on balance, falls, and fear of falling                                                            | Balance training                                                                           | VR system (Balance Rehabilitation Unit)               | 60; 79.3 (SD 10) and 75 (SD 8); male/female: 28/42 at baseline                       | Experienced fall or balance issues     | Intervention and control groups | Not specified. Groups received fall prevention recommendations and education                                    | 6 weeks: 2 times per week; 20 minutes per session; follow-up after 9 months | Posture, fall rate, gait, grip strength, serum measurements, depression, fear of falling | Fall rate, gait rate, Groningen Elderly Test, balance parameters          | EG showed significant improvement in balance parameters ( $P<.01$ ), significant reduction in falls, and lower levels of fear of falling ( $P<.01$ ). Some components of balance that were improved in EG showed a decline 9 months after training.                                                                                               |
| 7 | Bacha et al [54] | Compare the effectiveness of Kinect Adventures games versus conventional physiotherapy to improve postural control, gait, cardiorespiratory fitness, and cognition | Four Kinect Adventures games                                                               | Kinect Adventures Games for Microsoft Xbox 360 Kinect | 46; mean 66.5 (range 65.0-71.75) and mean 71.0 (range 66.0-74.5); male/female: 12/34 | No mention of fall risk/rate           | Randomized clinical trial       | Familiarization sessions with a therapist's instructions and explanation. Participants who passed were excluded | 7 weeks: 2 times per week; 60 minutes per session                           | Postural control, gait, cardiorespiratory fitness, cognition                             | Mini-BESTest <sup>m</sup> , Functional Gait Assessment, 6MST <sup>n</sup> | No significant differences between EG and CG; both interventions provided positive effects on postural control, gait, cardiorespiratory fitness, and cognition (post hoc Tukey test; $P<.05$ ).                                                                                                                                                   |

|    | Study               | Aim                                                                                                                                                                                               | Type of exercise                              | Technology                                                            | Sample size, age (years) (experimental and control groups), gender           | Participants' history or risk of falls | Study design                                            | Involvement of health care professionals                                        | Duration of intervention and follow-up                   | Outcome measures                                                                 | Measurements (of physical functions)                                                                                                                                                        | Results after intervention                                                                                                                                                                                                                                                                                                                   |
|----|---------------------|---------------------------------------------------------------------------------------------------------------------------------------------------------------------------------------------------|-----------------------------------------------|-----------------------------------------------------------------------|------------------------------------------------------------------------------|----------------------------------------|---------------------------------------------------------|---------------------------------------------------------------------------------|----------------------------------------------------------|----------------------------------------------------------------------------------|---------------------------------------------------------------------------------------------------------------------------------------------------------------------------------------------|----------------------------------------------------------------------------------------------------------------------------------------------------------------------------------------------------------------------------------------------------------------------------------------------------------------------------------------------|
| 8  | Htut et al [47]     | Compare the effects of physical exercise, VR-based exercise, and brain exercise on balance, muscle strength, cognition, and fall concern                                                          | VR games and brain games                      | Microsoft Xbox 360 Kinect                                             | 84; 75.8 (SD 5.19); male/female: 47/37                                       | No mention of fall risk/rate           | Randomized controlled trial                             | Exercises were conducted by a physiotherapist                                   | 8 weeks: 3 times per week; 30 minutes per session        | Balance, muscle strength, cognition, fall concern                                | BBS, TUG, 5TSTS, left and right HGS <sup>o</sup>                                                                                                                                            | CG showed significant improvement in TUG and 5TSTS to a greater extent than EG (TUG: $P=.004$ , 5TSTS: $P=.02$ ). EG significantly improved MoCA ( $P<.001$ ) and FES-I ( $P=.03$ ) compared with CG. EG and CG significantly ( $P<.001$ ) increased Borg CR-10 in all exercise sessions. EG reported higher enjoyment than CG ( $P<.001$ ). |
| 9  | Gschwind et al [48] | Assess the feasibility (exercise adherence, acceptability, and safety) of the intervention program and its effectiveness against common fall risk factors                                         | Balance sessions and muscle strength sessions | iStoppFalls, PC/Kinect-based fall preventive exercise game (exergame) | 153; 74.7 (SD 6.7) and 74.7 (SD 6.0); male/female: 60/93                     | No mention of fall risk/rate           | Randomized controlled trial                             | Not specified. Groups received educational booklets                             | 16 weeks: 180 minutes per week; follow-up after 6 months | Fall risk, health status, health measures, physical measures, cognitive measures | Physiological Profile Assessment, 12-item WHO Disability Assessment Schedule, tests for coordinated stability and maximal balance range, static balance, walking speed over 4 m, 5TSTS, TUG | Physiological fall risk reduced significantly more in EG compared with CG ( $F_{1,127}=4.54$ , $P=.03$ ).                                                                                                                                                                                                                                    |
| 10 | Sápi et al [55]     | Find out if Kinect training is superior to conventional balance training in aspects of functional balance tests and posturography measurements testing postural stability through visual feedback | Microsoft Xbox 360 Kinect videogames          | Microsoft Xbox 360 Kinect                                             | 75; 69.57 (SD 4.66), 69.12 (SD 4.19), and 67.18 (SD 5.56); male/female: 6/70 | No mention of fall risk/rate           | Intervention, conventional exercise, and control groups | The training sessions were conducted by physiotherapists. Pilot testing session | 6 weeks: 3 times per week; 30 minutes per session        | Balance, reaction, movement velocity                                             | FSST <sup>p</sup> , Functional Reach Test; TUG, LOS <sup>q</sup>                                                                                                                            | EG and CG showed progress in the follow-up measurements. More statistically significant improvements were found in EG in TUG ( $P<.05$ ), TUG cognitive dual-task test ( $P<.05$ ), Four-Square Step Test ( $P<.05$ ), Functional Reach Test ( $P<.05$ ), LOS movement velocity ( $P<.05$ ).                                                 |

|    | Study               | Aim                                                                                                              | Type of exercise                          | Technology                                       | Sample size, age (years) (experimental and control groups), gender                  | Participants' history or risk of falls | Study design                    | Involvement of health care professionals                                                                                                          | Duration of intervention and follow-up                                                 | Outcome measures                                                                                 | Measurements (of physical functions)                                                  | Results after intervention                                                                                                                                                                                                                                                                      |
|----|---------------------|------------------------------------------------------------------------------------------------------------------|-------------------------------------------|--------------------------------------------------|-------------------------------------------------------------------------------------|----------------------------------------|---------------------------------|---------------------------------------------------------------------------------------------------------------------------------------------------|----------------------------------------------------------------------------------------|--------------------------------------------------------------------------------------------------|---------------------------------------------------------------------------------------|-------------------------------------------------------------------------------------------------------------------------------------------------------------------------------------------------------------------------------------------------------------------------------------------------|
| 11 | Singh et al [58]    | Quantify the effectiveness of VR balance games in decreasing risk and fear of falls among older women            | Wii Fit games                             | Nintendo Wii Fit with a Balance Board            | 36; 61.12 (SD 3.72) and 64.00 (SD 5.88); male/female: 0/36                          | No mention of fall risk/rate           | Randomized controlled trial     | Demonstration and trial session were provided. Participants performed the games on their own with one-on-one supervision by a therapist assistant | 6 weeks: 2 times per week; 60 minutes per session                                      | Fall risk, fear of fall                                                                          | Physiological Profile Approach, ABC <sup>r</sup>                                      | Both EG and CG showed a significant decrease in PPA ( $P<.001$ ) and ABC-6 ( $P<.01$ ). No significant effects were demonstrated between the groups in PPA ( $P=.18$ ) and ABC-6 ( $P=.25$ ). Time and group interaction effect were not significant for PPA ( $P=.18$ ) and ABC-6 ( $P=.45$ ). |
| 12 | Rendon et al [56]   | Determine the feasibility and outcome using the Wii Fit games for improvement of dynamic balance                 | Wii Fit games                             | Nintendo Wii Fit with a Balance Board (WBB)      | 40; 85.7 (SD 4.3) and 83.3 (SD 6.2); male/female: 14/26                             | No mention of fall risk/rate           | Randomized clinical trial       | For EG <sup>c</sup> , a physical therapist was present to assist the participant in the operation of the game or in stepping on or off the WBB    | 6 weeks: 3 times per week; 35–45 minutes per session                                   | Coordination and agility, dynamic balance, balance confidence                                    | 8 Foot Up and Go, ABC, Geriatric Depression Scale                                     | Compared with CG, EG showed significant improvements in 8 Foot Up and Go (median decrease of 1.0 seconds vs -0.2 seconds, [ $P=.03$ ] and ABC [6.9% vs 1.3%, $P=.03$ ]).                                                                                                                        |
| 13 | Stanmore et al [59] | Determine the effectiveness of a tailored OTAGO/FaME-based strength and balance exergame for reducing falls risk | Tailored fall prevention exergame program | Laptop and Kinect sensor                         | 106; 77.8 (SD 10.2)/range 58-101 and 77.9 (SD 8.9)/range: 58-96; male/female: 23/83 | No mention of fall risk/rate           | Randomized controlled trial     | Supported by physiotherapists or trained assistants. Educational materials                                                                        | 12 weeks: total exercise time of 359 minutes; fall diary for 3 months after experiment | Balance, risk and fear of fall, mobility, pain, mood, fatigue, cognition, quality of life, falls | BBS, fall rate (diary), TUG, Fall risk score, Physical Activity Scale for the Elderly | There was an adjusted mean improvement in balance (BBS) of 6.2 (95% CI 2.4-10.0) and reduced fear of falling ( $P=.007$ ) and pain ( $P=.02$ ) in EG. The change in fall rates significantly favored the EG (incident rate ratio 0.31 [95% CI 0.16-0.62, $P=.001$ ]).                           |
| 14 | Yoo et al [62]      | Determine the effects of AR-based Otago exercise on balance, gait, and falls efficacy of older women.            | Otago exercise                            | Computer with a web camera, head-mounted display | 21; 72.90 (SD 3.41) and 75.64 (SD 5.57); male/female: 0/21                          | No mention of fall risk/rate           | Intervention and control groups | Not specified. The first week started with a moderate-intensity exercise program                                                                  | 12 weeks: 3 times per week; 80 minutes per session                                     | Balance, gait, falls efficacy                                                                    | BBS, gait parameters (velocity, cadence, step length, stride length), falls efficacy  | EG showed significant increases in BBS, velocity, cadence, step length (right side), stride length (right side and left side), and falls efficacy.                                                                                                                                              |

|    | Study             | Aim                                                                                                                   | Type of exercise       | Technology                                   | Sample size, age (years) (experimental and control groups), gender | Participants' history or risk of falls | Study design                    | Involvement of health care professionals                      | Duration of intervention and follow-up            | Outcome measures                                  | Measurements (of physical functions)                                                                                                                                          | Results after intervention                                                                                                                                                                  |
|----|-------------------|-----------------------------------------------------------------------------------------------------------------------|------------------------|----------------------------------------------|--------------------------------------------------------------------|----------------------------------------|---------------------------------|---------------------------------------------------------------|---------------------------------------------------|---------------------------------------------------|-------------------------------------------------------------------------------------------------------------------------------------------------------------------------------|---------------------------------------------------------------------------------------------------------------------------------------------------------------------------------------------|
| 15 | Cho et al [49]    | Determine the effects of VR-based balance training on balance                                                         | Wii Fit games          | Nintendo Wii Fit with a Balance Board        | 32; 73.1 (SD 1.1) and 71.7 (SD 1.2); male/female: not specified    | No mention of fall risk/rate           | Intervention and control groups | Not specified                                                 | 8 weeks: 3 times per week; 30 minutes per session | Balance                                           | Romberg test on a Bio-rescue                                                                                                                                                  | Body center of pressure movement area of EG with eyes open and closed significantly improved ( $P<.05$ ), while CG did not ( $P>.05$ ).                                                     |
| 16 | Ku et al [28]     | Evaluate the clinical efficiency of a novel 3D interactive AR system (3D-ARS) for balance and mobility rehabilitation | Balance training       | 3D interactive system using a kinetic sensor | 36; 64.7 (SD 7.27) and 65.0 (SD 4.77); male/female: 17/17          | No mention of fall risk/rate           | Randomized controlled trial     | Not specified                                                 | 4 weeks: 3 times per week; 30 minutes per session | Dynamic balance, coordination, fall risk, posture | BBS, TUG, functional ambulation category, modified Barthel index; lower extremity subscale of the Fugl-Meyer Assessment, Fugl-Meyer motor Assessment, automatic balance score | Both groups showed improvements in stability index, weight distribution index, fall risk index, and Fourier transformation index after urography. Changes were significantly greater in EG. |
| 17 | Anson et al [57]  | Determine whether trunk motion VFB treadmill walking would improve over-ground balance                                | Walking on a treadmill | TV, 2 webcams, stationary bulls-eye target   | 40; 75.8 (SD 6.5) and 75.7 (SD 5.3); male/female: 11/29            | No mention of fall risk/rate           | Intervention and control groups | Not specified. Participants were instructed                   | 4 weeks: 3 times per week; 30 minutes per session | Gait, balance                                     | The BESTest, mini-BESTest, BBS, TUG, ABC, 6MWT                                                                                                                                | EG significantly improved on the BESTest ( $P=.03$ ) and the mini-BEST ( $P=.01$ ). CG did not improve significantly on any measure.                                                        |
| 18 | Tsang and Fu [50] | Compare Wii Fit balance training with conventional balance training                                                   | Wii Fit games          | Nintendo Wii Fit                             | 79; 82.3 (SD 3.8) and 82.0 (SD 4.3); male/female: 31/48            | No mention of fall risk/rate           | Randomized clinical trial       | CG <sup>d</sup> training regimen was led by a physiotherapist | 6 weeks: 1 time per week; 60 minutes per session  | Balance                                           | BBS, TUG, endpoint and maximum excursions in all 4 directions in the limits of stability test                                                                                 | BBS score, TUG, endpoint and maximum excursions in all 4 directions in the limits of stability test improved significantly in EG. CG significantly improved only BBS and TUG.               |

|    | Study             | Aim                                                                                                                                                                                                    | Type of exercise                            | Technology                                                                           | Sample size, age (years) (experimental and control groups), gender | Participants' history or risk of falls | Study design                    | Involvement of health care professionals                                                                                 | Duration of intervention and follow-up             | Outcome measures                                                                      | Measurements (of physical functions)                                                                               | Results after intervention                                                                                                                                                                                                                                                                                                                       |
|----|-------------------|--------------------------------------------------------------------------------------------------------------------------------------------------------------------------------------------------------|---------------------------------------------|--------------------------------------------------------------------------------------|--------------------------------------------------------------------|----------------------------------------|---------------------------------|--------------------------------------------------------------------------------------------------------------------------|----------------------------------------------------|---------------------------------------------------------------------------------------|--------------------------------------------------------------------------------------------------------------------|--------------------------------------------------------------------------------------------------------------------------------------------------------------------------------------------------------------------------------------------------------------------------------------------------------------------------------------------------|
| 19 | Lee et al [51]    | Use 3D video gaming technology in VR training to improve postural balance and lower extremity strength                                                                                                 | Wii Fit games                               | Nintendo Wii Fit with a Balance Board and Wii Fit joystick                           | 40; 76.15 (SD 4.55) and 75.71 (SD 4.91); male/female: 17/23        | No mention of fall risk/rate           | Intervention and control groups | Six assistants monitored participants throughout the program. Groups received fall prevention education                  | 6 weeks: 2 times per week; 60 minutes per session  | Static and dynamic balance                                                            | GBS, 1-legged stance test, BBS Functional Reach Test, TUG, sit-to-stand test                                       | EG showed significant improvements in static and dynamic postural balance and lower extremity strength ( $P<.05$ ). EG improved overall in the considered parameters compared with CG ( $P<.05$ ).                                                                                                                                               |
| 20 | Chen et al [52]   | Compare the beneficial effects of AR-assisted selected Tai Chi intervention with the complete sequence of traditional Tai Chi exercises                                                                | Traditional Tai Chi exercises               | AR training system (based on Microsoft Kinect)                                       | 28; 72.2 (SD 2.8) and 75.1 (SD 5.5); male/female: 3/25             | No mention of fall risk/rate           | Prospective randomized trial    | CG received instruction from a certified Tai-Chi master                                                                  | 8 weeks: 3 times per week; 30 minutes per session  | Balance                                                                               | BBS, TUG, Functional Reach Test, muscle strength measurements of the lower extremities                             | EG showed significant improvement in BBS, TUG, and Functional Reach Test. Although all 3 functional balance test scores improved in CG, only the improvement in BBS was statistically significant ( $P<.001$ ). All muscle strength measurements increased by an average of $3.1 \pm 1.0$ kgw in EG and $1.6 \pm 0.8$ kgw in CG.                 |
| 21 | Jeon and Kim [53] | Prevent rapidly decreasing muscle loss in the elderly and confirm the effect of AR-based exercise on the exercise self-efficacy in the elderly, thus exploring the sustainability of AR-based exercise | Regular, aerobic, and flexibility exercises | AR-based exercise rehabilitation system (UIN-HEALT); PC, a 3D motion analysis sensor | 27; 72.77 (SD 3.79) and 72.71 (SD 3.64); Male/female: 0/27         | No mention of fall risk/rate           | Intervention and control groups | AR system was operated by an exercise specialist who controlled the participants' training modules and difficulty levels | 12 weeks: 5 times per week; 30 minutes per session | Physical performance, balance, mobility, walking skill, exercise, Self-Efficacy Scale | Appendicular skeletal muscle mass, skeletal muscle index, gait speed, senior fitness test, 2MST <sup>a</sup> , TUG | Appendicular skeletal muscle mass ( $F=11.222$ , $P<.002$ ) and skeletal muscle index ( $F=11.222$ , $P<.002$ ) increased more in EG than in CG ( $F=11.222$ , $P<.002$ ); gait speed was significantly increased ( $F=7.221$ , $P<.005$ ). Exercise self-efficacy was significantly increased in EG ( $F=20.464$ , $P<.001$ ) compared with CG. |

<sup>a</sup>VR: virtual reality.

<sup>b</sup>AR: augmented reality.

<sup>c</sup>EG: experimental group.

<sup>d</sup>CG: control group.

<sup>e</sup>GBS: good balance system.

<sup>f</sup>2MWT: 2-Minute Walk Test.

<sup>g</sup>5TSTS: 5 Times Sit to Stand.

<sup>h</sup>TUG: Timed Up and Go.

<sup>i</sup>BBS: Berg Balance Scale.

<sup>j</sup>MMT: Manual Muscle Test.

<sup>k</sup>FP: force plate.

<sup>l</sup>MFS: Morse Fall Scale.

<sup>m</sup>BESTest: Balance Evaluation Systems Test.

<sup>n</sup>6MST: 6-Minute Step Test.

<sup>o</sup>HGS: hand grip strength.

<sup>p</sup>FSST: The Four Square Step Test.

<sup>q</sup>LOS: limits of stability.

<sup>r</sup>ABC: Activity-Specific Balance Confidence Scale.

<sup>s</sup>2MST: 2-Minute Step Test.
